# Supplementary material for: Dosage regulation, and variation in gene expression and copy number of human Y chromosome ampliconic genes
Source: PLoS Genet. 2019 Sep 16;15(9):e1008369. doi: 10.1371/journal.pgen.1008369 (PMC6772104; doi:10.1371/journal.pgen.1008369)
Supplement: S1 Table — The numbers in the table represent the total number of gene copies for each ampliconic family present on the Y chromosome reference and used to simulate paired end fastq files and the copy number estimates using AmpliCoNE (Observed). The gene families in bold have custom copy numbers in each set. (XLSX) [file pgen.1008369.s001.xlsx]

## Sheet: Sheet1
Gene family	Set 1		Set 2		Set 3
	Expected	Observed	Expected	Observed	Expected	Observed
TSPY	22	22	29	29	23	23.3
RBMY	7	6.99	12	11.9	9	8.94
VCY	4	4.01	2	1.92	3	3.11
BPY2	3	3.02	3	2.98	3	2.92
CDY	4	3.93	4	4.07	4	3.96
DAZ	4	4.01	4	4.02	4	4
HSFY	2	2.08	2	2.04	2	1.93
PRY	2	1.96	2	2.01	2	1.98
XKRY	2	1.95	2	1.92	2	1.99
